# Supplementary material for: Effects of Semaglutide and Empagliflozin on Inflammatory Markers in Patients with Type 2 Diabetes
Source: MDPI journal article supplement (doi:10.3390/ijms24065714), 2023-03-16
Supplement: s1 [file s1]

# Supplementary Materials

**Supplementary Table S1. Baseline characteristics of the cohort.**

| Variable                             | Semaglutide<br>(n=10) | Empagliflozin<br>(n=10) | p-value |
|--------------------------------------|-----------------------|-------------------------|---------|
| Transferrin saturation (%)           | 28.6 ±5.8             | 25.3 ± 5.7              | 0.212   |
| Soluble transferrin receptors (mg/l) | 2.82 ±0.69            | 2.81 ±0.75              | 0.976   |
| Iron (µmol/l)                        | 19.8 ±3.6             | 16.6 ±3.6               | 0.060   |
| Hemoglobin (g/l)                     | 144 ±13.9             | 148 ±4.4                | 0.396   |
| Hematocrit (%)                       | 42.8 ±3.9             | 44.3 ±1.3               | 0.266   |
| MCHC (g/l)                           | 337 ±9.2              | 334 ±5.5                | 0.435   |
| Creatinine (µmol/l)                  | 76.5 ±30.5            | 78.2 ±16.2              | 0.592   |
| Uric acid (µmol/l)                   | 334.9 ±83.2           | 333.4 ±103.9            | 0.972   |

Data are expressed as mean ±SD. Abbreviations: MCHC- *mean corpuscular hemoglobin concentration*.

**Supplementary Table S2. Erythrocyte and iron metabolism parameters.**

|                                      | Semaglutide   |              |         | Empagliflozin |              |         |
|--------------------------------------|---------------|--------------|---------|---------------|--------------|---------|
|                                      | Pre-treatment | 3 months     | p-value | Pre-treatment | 3 months     | p-value |
| Haemoglobin (g/l)                    | 144 (13.87)   | 144 (11.5)   | 0.9708  | 148           | 155          | <0.0001 |
| Haematocrit (%)                      | 42.8 (3.9)    | 43.1 (3.1)   | 0.7606  | 44.3 (1.3)    | 46.7 (1.6)   | <0.0001 |
| MCHC (g/l)                           | 336.8 (9.2)   | 334.1 (5.5)  | 0.4598  | 334.1 (5.5)   | 332.9 (9.3)  | 0.5652  |
| Iron (µmol/l)                        | 19.79 (3.61)  | 17.72 (4.15) | 0.2292  | 16.57 (3.56)  | 17.67 (6.84) | 0.6421  |
| Soluble transferrin receptors (mg/l) | 2.82 (0.69)   | 2.53 (0.59)  | 0.0494  | 2.81 (0.75)   | 3.08 (0.91)  | 0.1327  |
| Transferrin saturation (%)           | 25.57 (9.31)  | 26.32 (8.38) | 0.8274  | 25.28 (5.66)  | 25.71 (9.94) | 0.8929  |

Data presented as mean ± SD. Statistics: paired t-test or Wilcoxon matched-pairs signed rank test as appropriate.
